# Supplementary material for: Mechanochemistry and Eco-Bases for Sustainable Michael Addition Reactions
Source: MDPI journal article supplement (doi:10.3390/molecules27103306), 2022-05-21
Supplement: s1 [file s1]

Supporting information

# Mechanochemistry and Eco-bases for Sustainable Michael Addition Reactions

Yvette Lock Toy Ki <sup>1</sup>, Armelle Garcia <sup>1</sup>, Franck Pelissier <sup>1</sup>, Tomasz K. Olszewski <sup>2</sup>, Alicja Babst-Kostecka <sup>3</sup>, Yves-Marie Legrand <sup>1</sup> and Claude Grison <sup>1,\*</sup>

- <sup>1</sup>. Laboratory of Bio-inspired Chemistry and Ecological Innovations (ChimEco), UMR 5021, CNRS, University of Montpellier, Cap Delta, 1682 rue de la Valsière, 34790 Grabels, France; yvette.lock-toy-ki@cnrs.fr (Y.L.T.K.); armelle.garcia@cnrs.fr (A.G.); franck.pelissier@cnrs.fr (F.P.); yves-marie.legrand@umontpellier.fr (Y.-M.L.)
  - <sup>2</sup>. Department of Physical and Quantum Chemistry, Faculty of Chemistry, Wrocław University of Science and Technology, Wybrzeże Wyspiańskiego 29, 50-370 Wrocław, Poland; tomasz.olszewski@pwr.edu.pl
  - <sup>3</sup>. Department of Environmental Science, The University of Arizona, 1110 E. South Campus Drive, Saguaro Hall, Building 33, Tucson, AZ 85721, USA; ababstkostecka@arizona.edu
- \* Correspondence: claude.grison@cnrs.fr

## 1. Spectral data

### 1.1. Dimethyl 2-(3-oxocyclopentyl)malonate

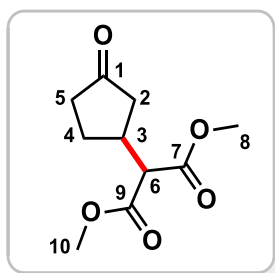

<sup>1</sup>H NMR (400 MHz, CDCl<sub>3</sub>)  $\delta$  (ppm): 3.75 (1 H, s, H-8), 3.73 (1H, s, H-10), 3.37 (1H, d,  $J$  = 9.4 Hz, H-6), 2.88-2.80 (1 H, m, H-3), 2.49 (1H, dd,  $J$  = 18.4, 7.6 Hz, H-2a), 2.38-2.2 (1 H, m, H-6a), 2.27-2.22 (1H, m, H-2b), 2.22-2.15 (1H, m, H-6b) 1.99 (1H, ddd,  $J$  = 18.4, 11.0, 1.2 Hz, H-4a), 1.71-1.57 (1H, m, H4-b)

<sup>13</sup>C NMR (100 MHz, CDCl<sub>3</sub>)  $\delta$  (ppm): 217.0 (C-1), 168.64 (C-7), 168.5 (C-9), 56.2, (C-6), 52.8 (x2) (C-8, C-10), 43.0 (C-3), 38.3 (C-2), 36.5 (C-6), 27.6 (C-4).

IR (neat, cm<sup>-1</sup>) : 2959, 2921, 2852, 1729,1436, 1147.

### 1.2. Dimethyl 2-(3-oxocyclohexyl)malonate

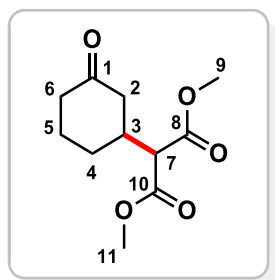

<sup>1</sup>H NMR (400 MHz, CDCl<sub>3</sub>)  $\delta$  (ppm): 3.72 (3H, s, H-9), 3.71 (3H, s, H-11), 3.32 (1H, d,  $J$  = 8 Hz, H-7), 2.51 (1H, dddd,  $J$  = 19.4, 15.7, 11.8, 7.7, 3.8 Hz, H-3), 2.39-2.45 (2H, m, H-6a, H-2b), 2.23-2.29 (2H, m, H-6b, H-2b), 2.04 (1H, dddd,  $J$  = 14.6, 10.4, 6.9, 3.6, H-5a), 1.93-1.96 (m, 1H, H-4a), 1.64-1.73 (1H, m, H-5b), 1.46-1.55 (1H, m, H-4b).

<sup>13</sup>C NMR (100 MHz, CDCl<sub>3</sub>)  $\delta$  (ppm): 209.6 (C-1), 168.3 (C-8, C-10), 56.7 (C-7), 52.7 (x2) (C-9, C-11), 45.1 (C-2), 41.1 (C-6), 38.2 (C-3), 28.9 (C-5), 24.6 (C-4).

### 1.3. Dimethyl 2-(3-oxo-1,3-diphenylpropyl)malonate

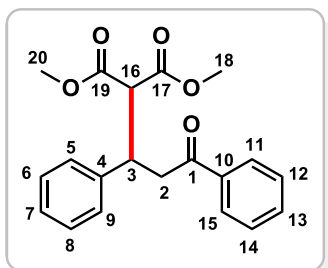

**<sup>13</sup>C NMR (100 MHz, CDCl<sub>3</sub>) δ (ppm):** 197.6 (C-1), 168.9 (C-17), 168.3 (C-19), 140.6 (C-4), 136.9 (C-10), 133.2 (C-11), 128.6 (x2) (C-5,C-9), 128.2 (x2) (C-6,C-8), 127.3 (C-15), 57.4 (C-16), 52.8 (C-18), 52.5 (C-20), 42.4 (C-2), 40.9 (C-3).

## 2. NMR Spectra

### 2.1. dimethyl 2-(3-oxocyclopentyl)malonate

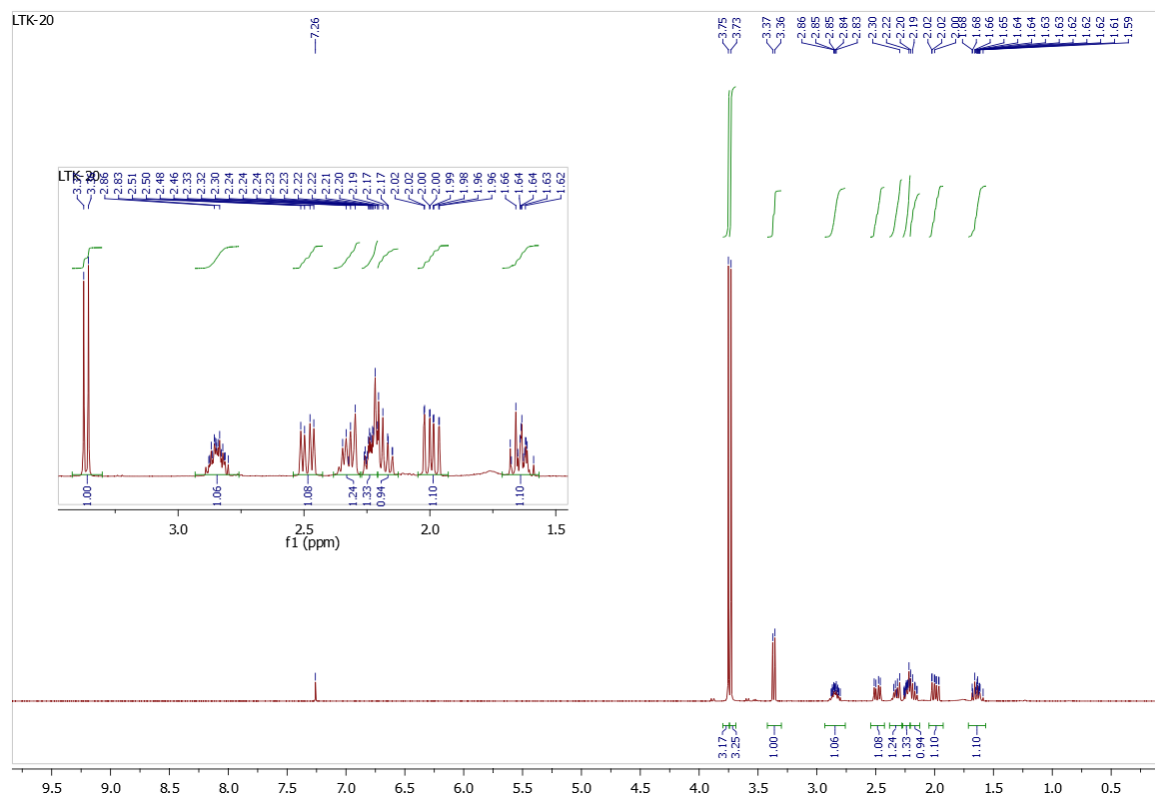

Figure S1.  $^1\text{H}$  NMR (400 MHz) spectrum of dimethyl 2-(3-oxocyclopentyl)malonate

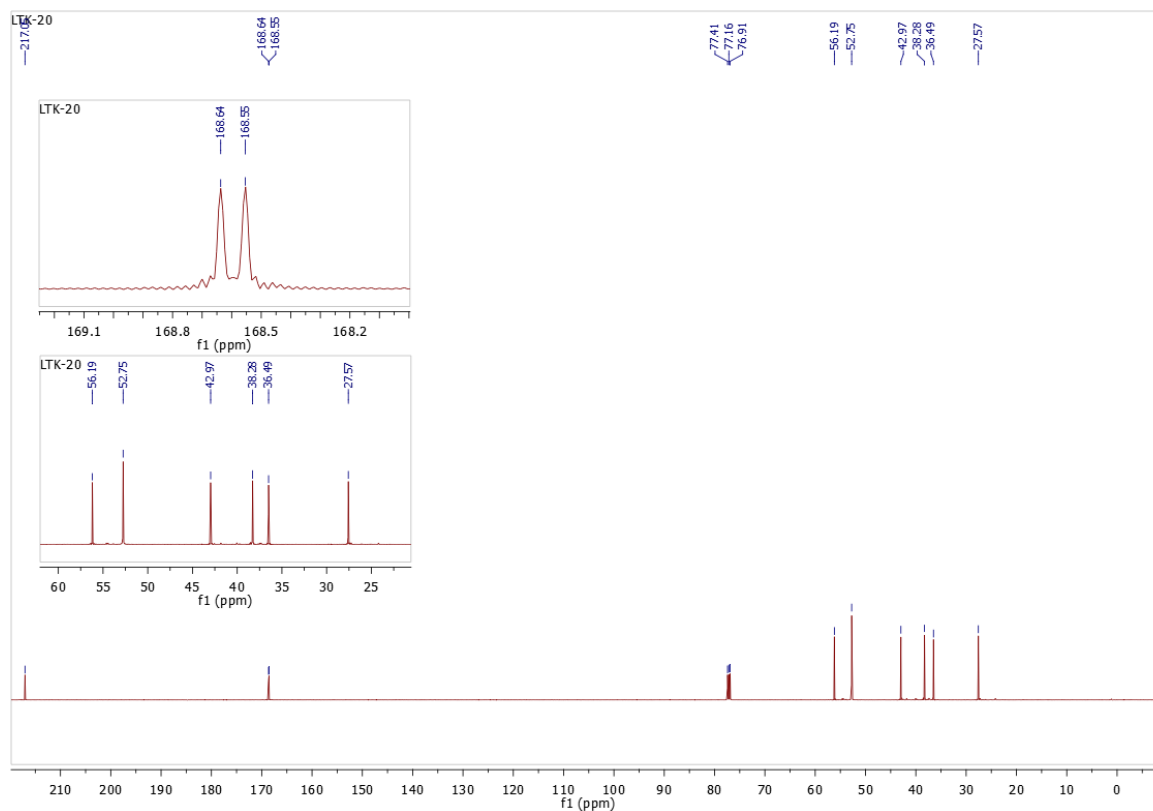

Figure S2. <sup>13</sup>C NMR (100 MHz) of dimethyl 2-(3-oxocyclopentyl)malonate

## 2.2. dimethyl 2-(3-oxocyclohexyl)malonate

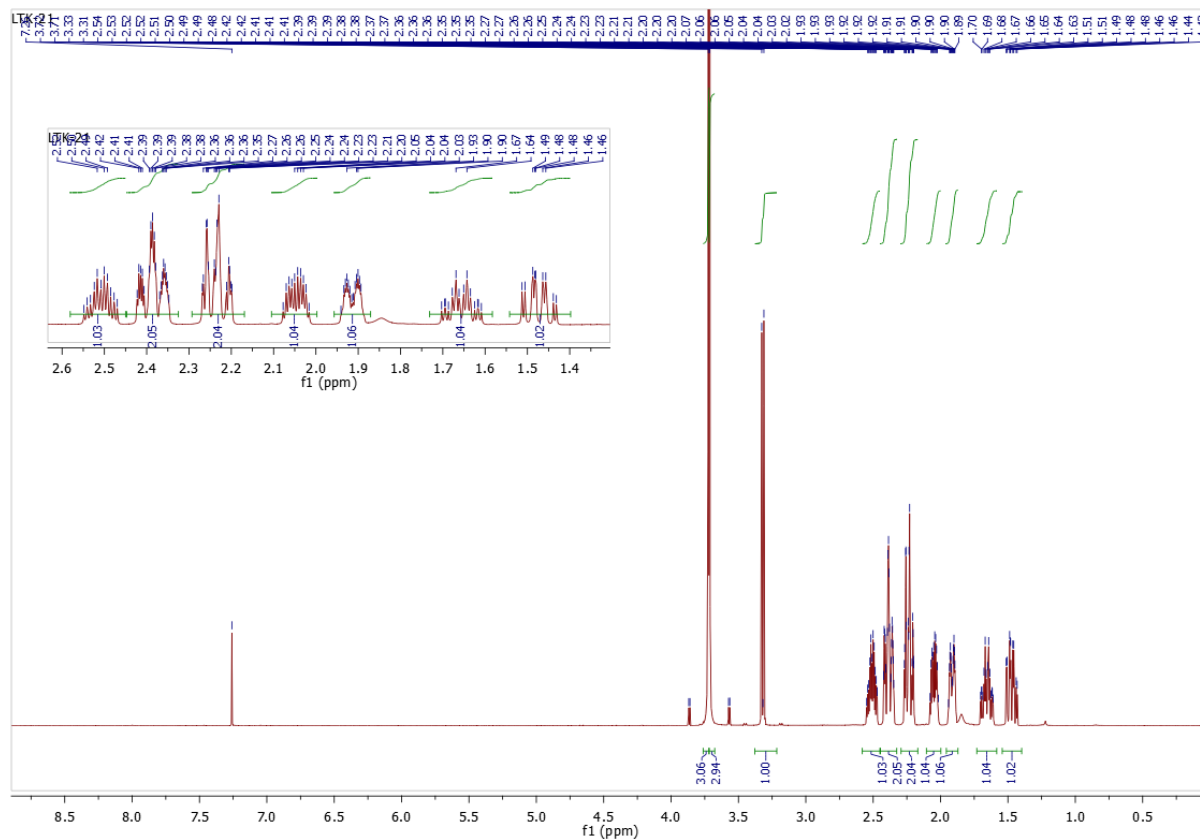

Figure S3.  $^1\text{H}$  NMR (400 MHz) spectrum of dimethyl 2-(3-oxocyclohexyl)malonate

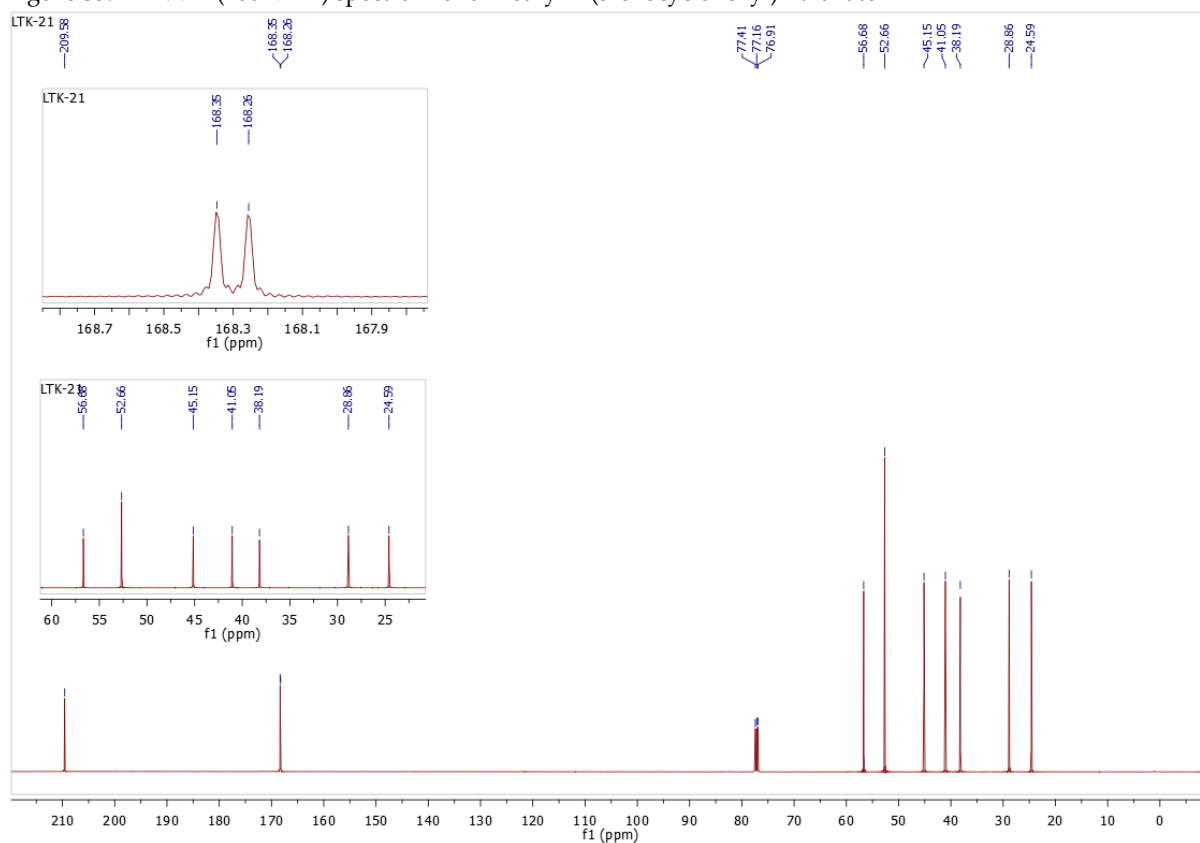

Figure S4.  $^{13}\text{C}$  NMR (100 MHz) spectrum of dimethyl 2-(3-oxocyclohexyl)malonate

### 2.3. dimethyl 2-(3-oxo-1,3-diphenylpropyl)malonate

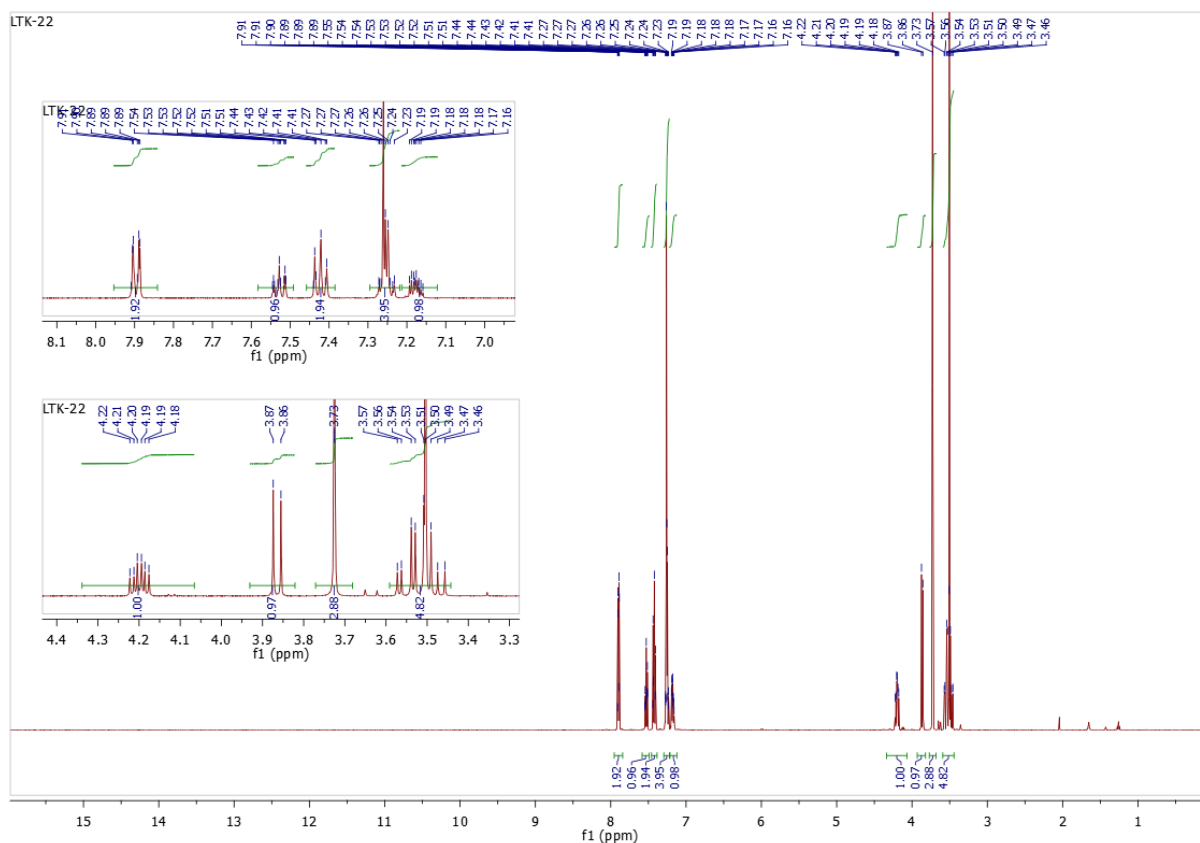

Figure S5.  $^1\text{H}$  NMR (400 MHz) spectrum of dimethyl 2-(3-oxo-1,3-diphenylpropyl)malonate

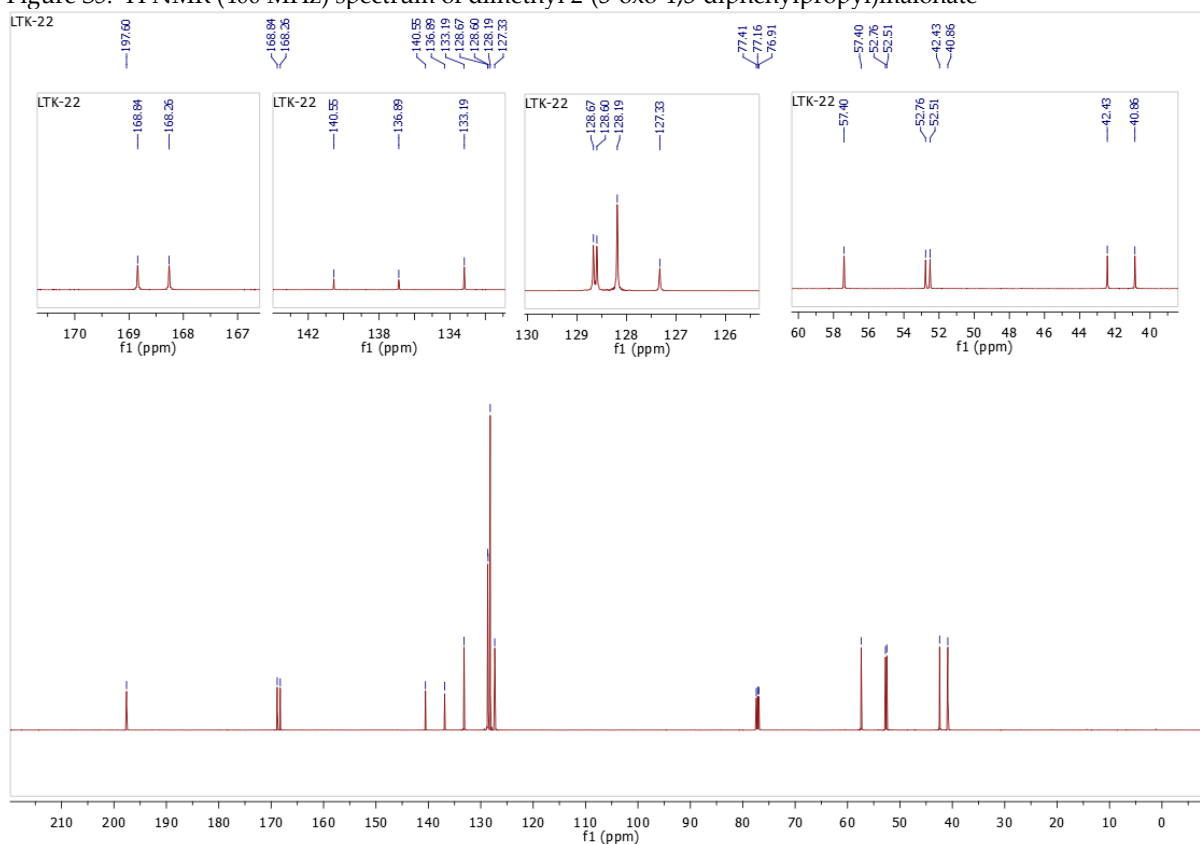

Figure S6.  $^{13}\text{C}$  NMR (100 MHz) spectrum of dimethyl 2-(3-oxocyclopentyl)malonate

### 3. IR Spectra

#### 3.1. dimethyl 2-(3-oxocyclopentyl)malonate

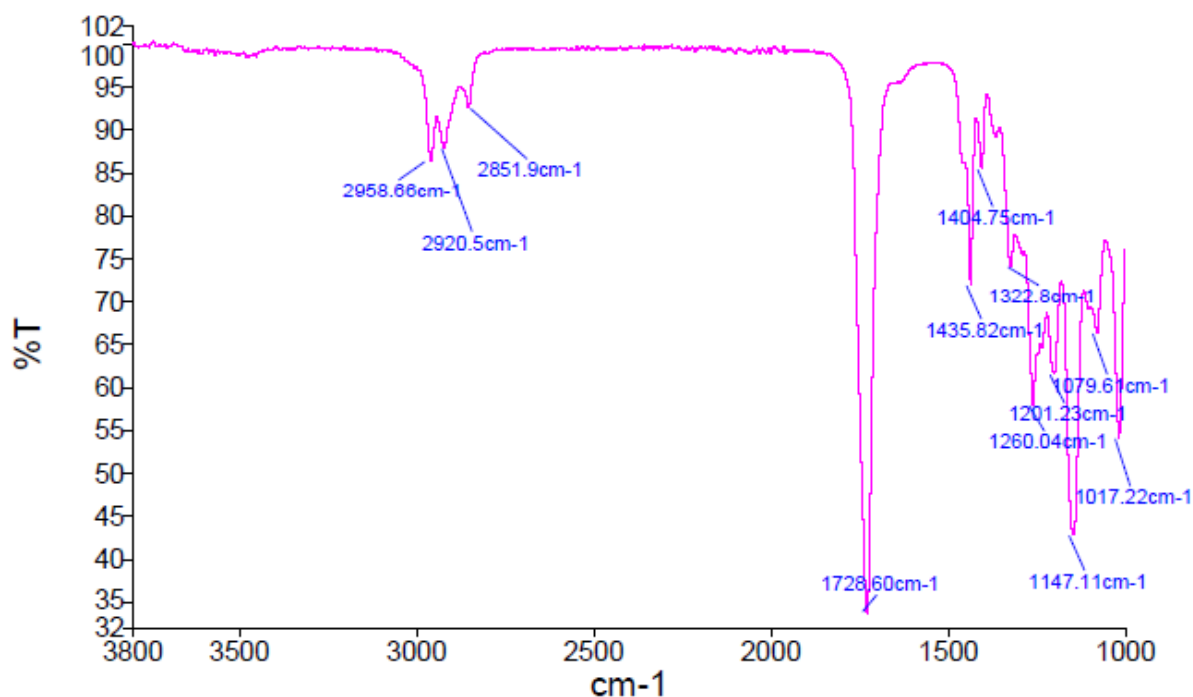

Figure S7. IR spectrum of dimethyl 2-(3-oxocyclopentyl)malonate

#### 3.2. dimethyl 2-(3-oxocyclohexyl)malonate

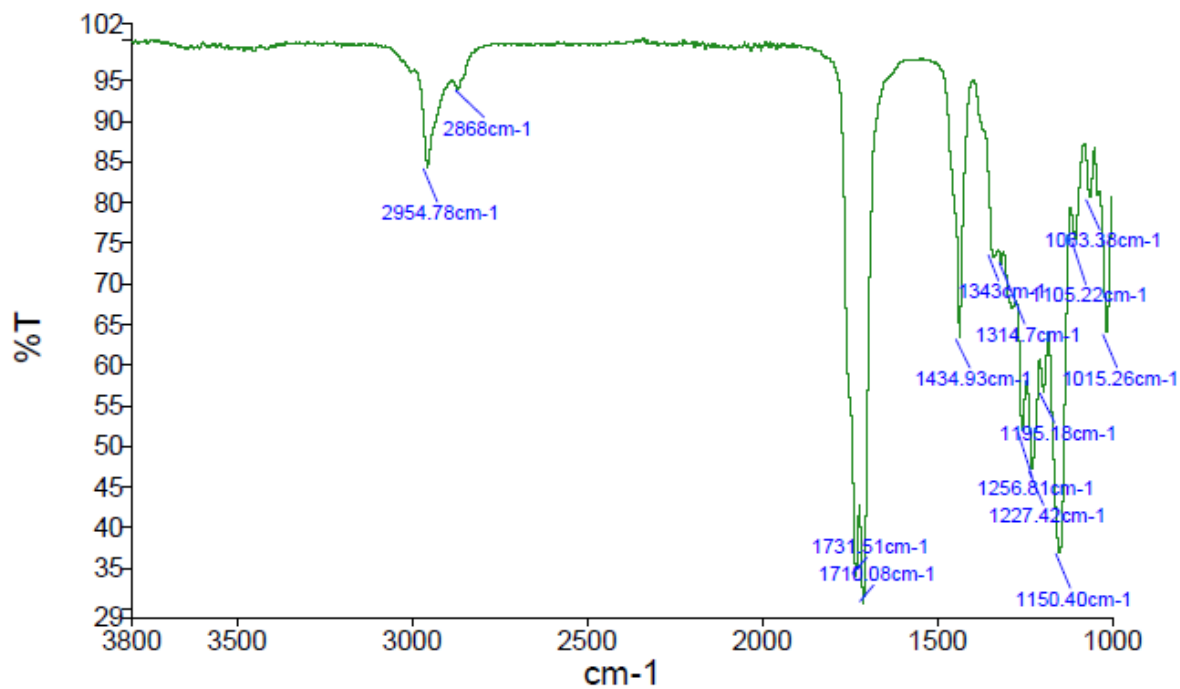

Figure S8. IR spectrum of dimethyl 2-(3-oxocyclohexyl)malonate

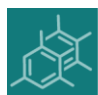

3.3. dimethyl 2-(3-oxo-1,3-diphenylpropyl)malonate

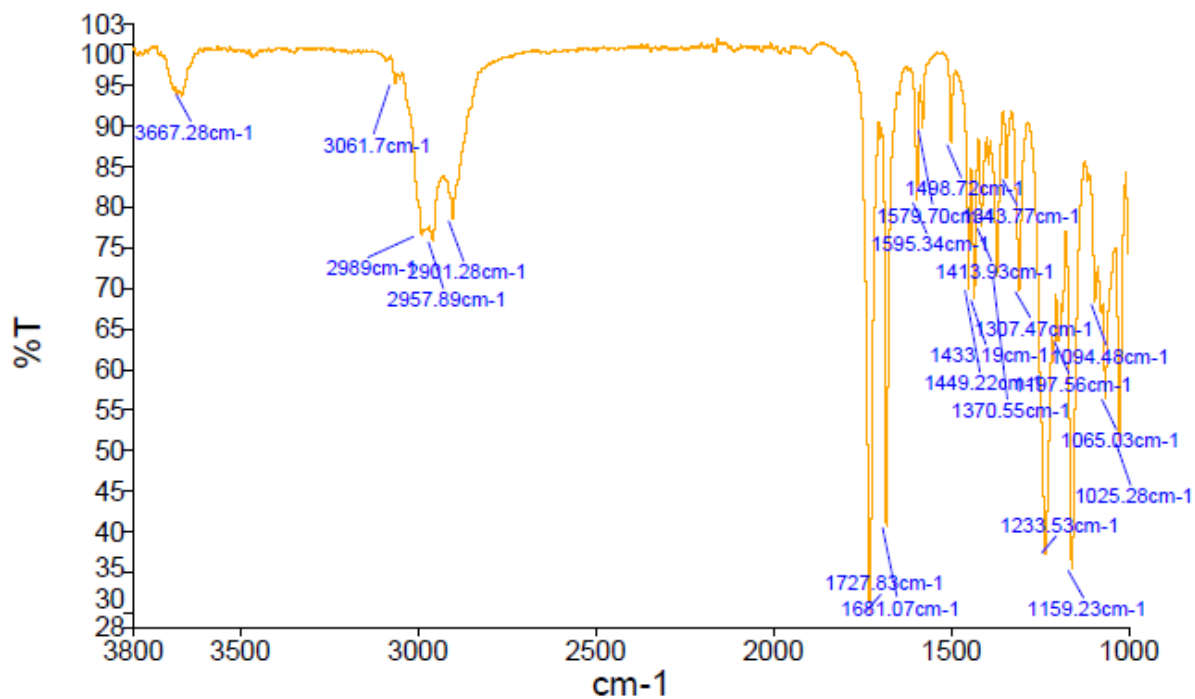

Figure S9. IR spectrum of dimethyl 2-(3-oxo-1,3-diphenylpropyl)malonate

#### 4. EBSD Images

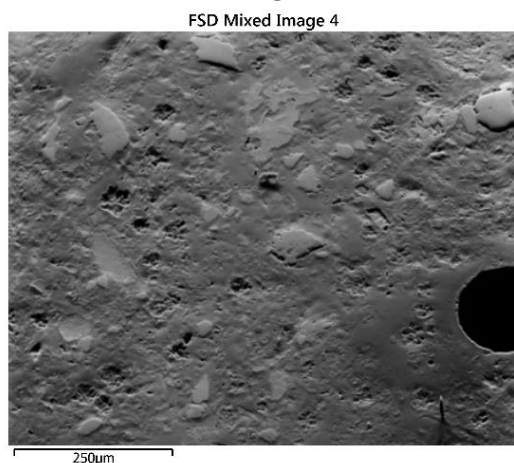

Table S1. EBSD Map Settings Table

|                         |          |
|-------------------------|----------|
| Accelerating Voltage    | 20.00 kV |
| Specimen Tilt (degrees) | 70.00 °  |
| Hit Rate                | 14.87 %  |
| Speed of Acquisition    | 39.46 Hz |

Table S2. Phase for acquisition

| Phase      | a      | b       | c       | Alpha   | Beta     | Gamma    | Space Group | Database             |
|------------|--------|---------|---------|---------|----------|----------|-------------|----------------------|
| Calcite    | 4.99 Å | 4.99 Å  | 17.06 Å | 90.00 ° | 90.00 °  | 120.00 ° | 0           | HKL                  |
| Quartz     | 4.91 Å | 4.91 Å  | 5.50 Å  | 90.00 ° | 90.00 °  | 120.00 ° | 0           | CHANNELPhaseDatabase |
| K_Feldspar | 8.57 Å | 12.96 Å | 7.22 Å  | 90.66 ° | 115.93 ° | 87.62 °  | 0           | CHANNELPhaseDatabase |
| Dolomite   | 4.78 Å | 4.78 Å  | 15.73 Å | 90.00 ° | 90.00 °  | 120.00 ° | 148         | ICSD                 |
| Calcite    | 4.99 Å | 4.99 Å  | 17.06 Å | 90.00 ° | 90.00 °  | 120.00 ° | 167         | ICSD                 |
| Oxyapatite | 9.43 Å | 9.43 Å  | 6.88 Å  | 90.00 ° | 90.00 °  | 120.00 ° | 174         | ICSD                 |
| Tremolite  | 9.86 Å | 18.12 Å | 5.29 Å  | 90.00 ° | 104.57 ° | 90.00 °  | 12          | ICSD                 |
| Low albite | 8.14 Å | 12.78 Å | 7.16 Å  | 94.19 ° | 116.61 ° | 87.68 °  | 0           | CHANNELPhaseDatabase |

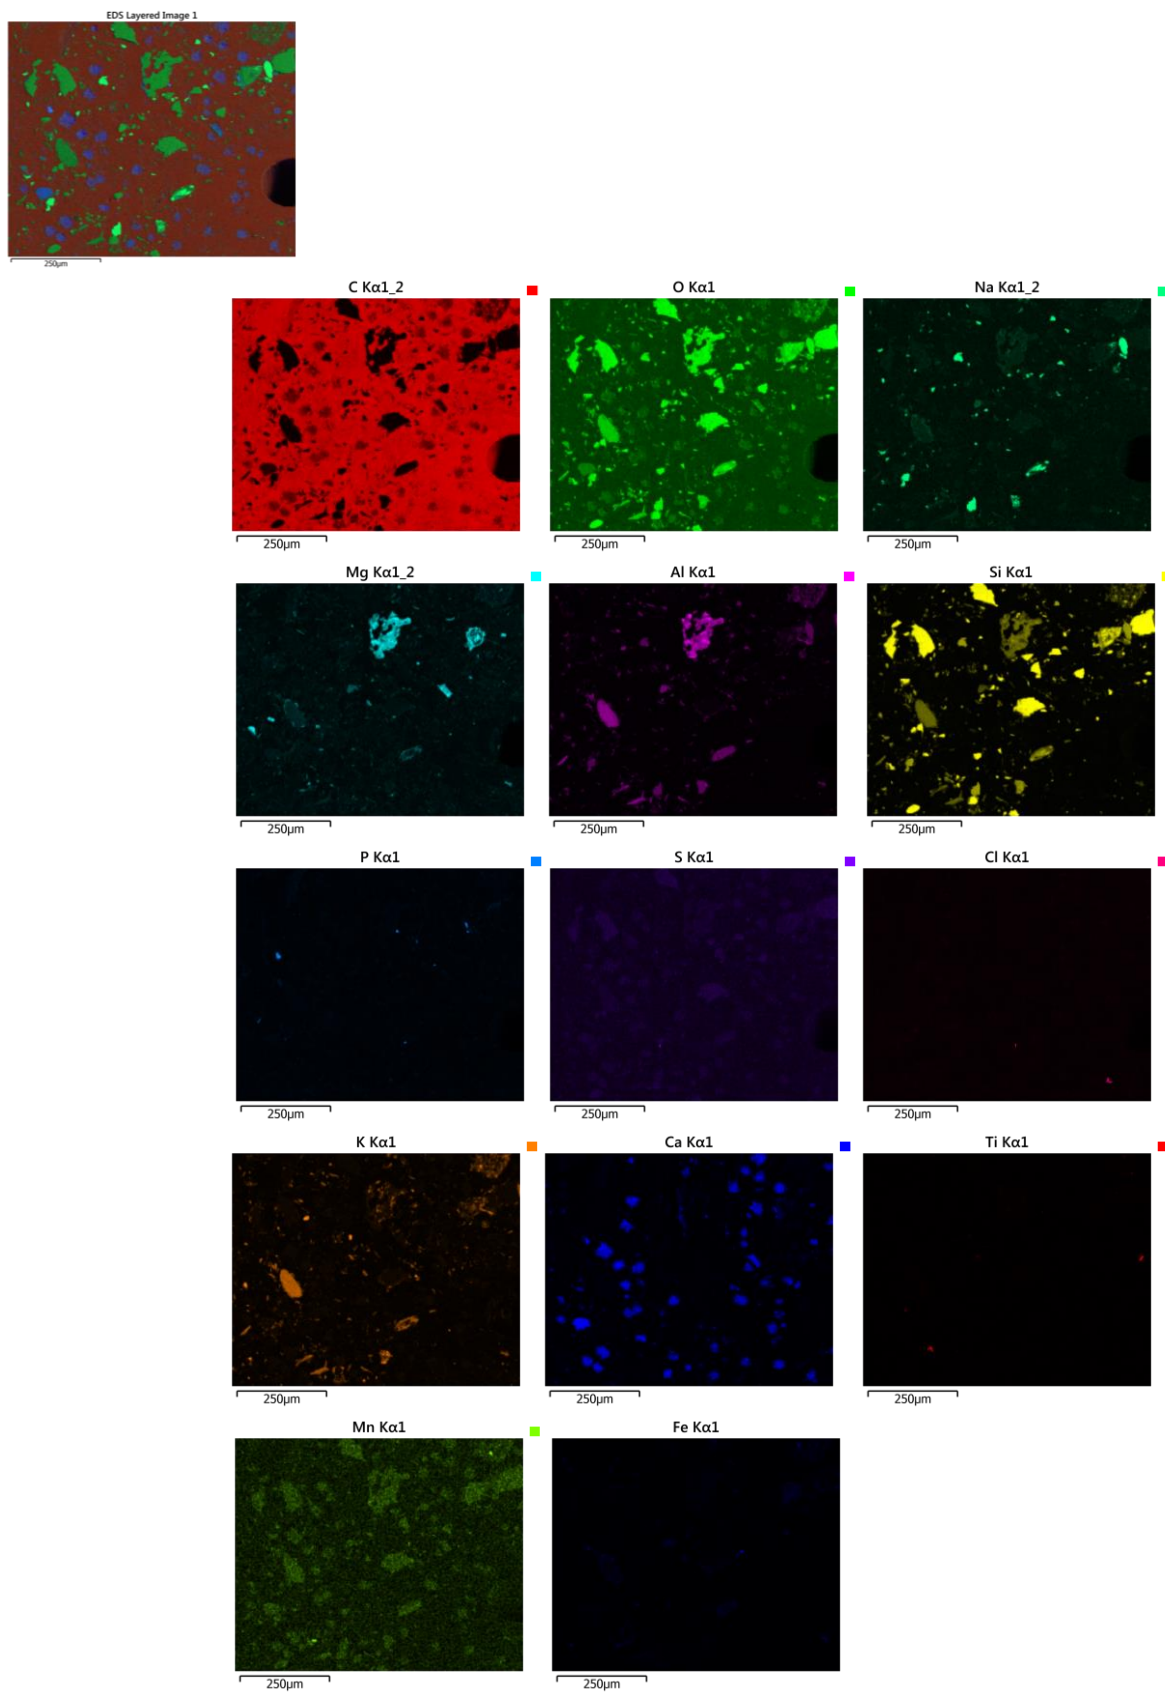

Figure S10. EDS Layered Images

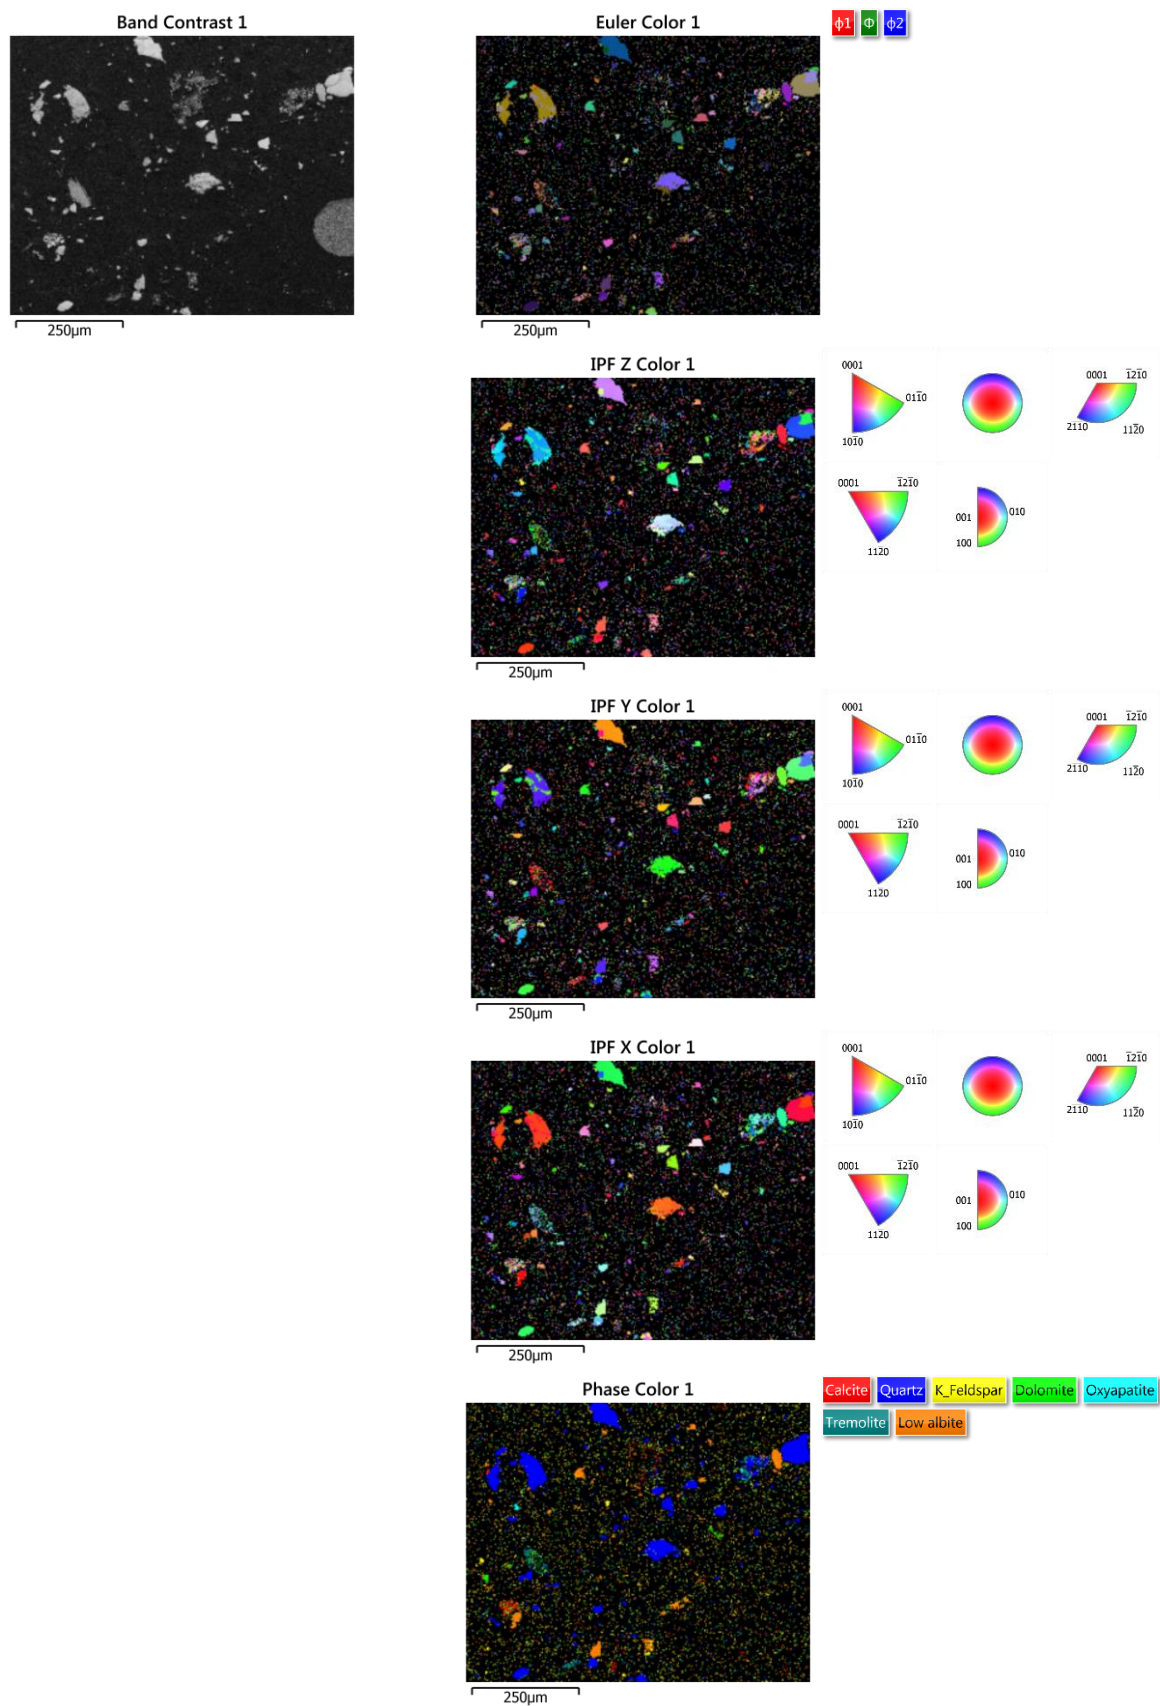

Figure S11. Phase coloration

Table S3 : Phase fraction

| Phase Name     | Phase Fraction (%) | Phase Count | Mean Band Contrast | Standard Deviation Band Contrast | Min Band Contrast | Max Band Contrast | Mean MAD | Standard Deviation MAD | Min MAD | Max MAD |
|----------------|--------------------|-------------|--------------------|----------------------------------|-------------------|-------------------|----------|------------------------|---------|---------|
| Calcite        | 0.56               | 475         | 101.03             | 41.35                            | 25.00             | 211.00            | 0.93     | 0.22                   | 0.39    | 1.99    |
| Quartz         | 4.73               | 3991        | 131.43             | 41.37                            | 23.00             | 200.00            | 0.74     | 0.28                   | 0.21    | 1.98    |
| K_Feldspar     | 4.01               | 3384        | 45.25              | 18.08                            | 23.00             | 154.00            | 1.26     | 0.28                   | 0.34    | 2.00    |
| Dolomite       | 0.91               | 769         | 64.40              | 39.51                            | 24.00             | 196.00            | 1.18     | 0.34                   | 0.31    | 1.99    |
| Oxyapatite     | 0.35               | 299         | 54.99              | 31.69                            | 25.00             | 193.00            | 1.23     | 0.31                   | 0.39    | 2.00    |
| Tremolite      | 1.65               | 1393        | 55.07              | 28.35                            | 23.00             | 174.00            | 1.18     | 0.31                   | 0.41    | 1.99    |
| Low albite     | 2.65               | 2238        | 68.95              | 40.70                            | 24.00             | 169.00            | 1.12     | 0.36                   | 0.35    | 2.00    |
| Zero Solutions | 85.13              | 71815       | 42.37              | 12.46                            | 0.00              | 177.00            |          |                        |         |         |

## 5. XRPD analysis

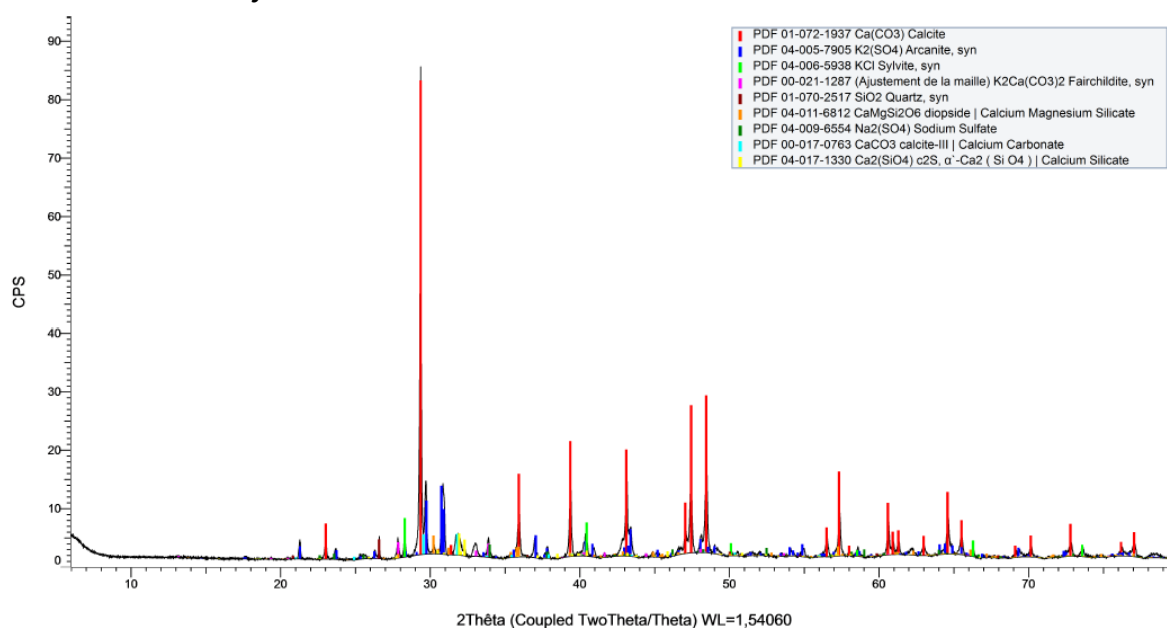

Figure S12 : XRPD analysis of Eco-base-Fj

## 6. Ionic chromatography

1.0018 g of Eco-base-Fj and water (10 mL) was stirred during 2 h. The solid state of Eco-base-Fj was centrifugated and the liquid state was analyzed.

Table S4. Ionic chromatography of Eco-base-Fj

| [X <sup>n-</sup> ]               | tr (min) | [X <sup>n-</sup> ] (g/L) | [X <sup>n-</sup> ] (mg/g of Eco-base-Fj) | [X <sup>n-</sup> ] (mmol/g of Eco-base-Fj) | [K <sub>a</sub> X] (mg/g of Eco-base-Fj) |
|----------------------------------|----------|--------------------------|------------------------------------------|--------------------------------------------|------------------------------------------|
| [Cl <sup>-</sup> ]               | 8.9      | 7.967                    | 79.5                                     | 2.24                                       | 163                                      |
| [SO <sub>4</sub> <sup>2-</sup> ] | 22.6     | 6.838                    | 68.3                                     | 0.71                                       | 124                                      |
| [CO <sub>3</sub> <sup>2-</sup> ] | 18.1     | 4.377                    | 37.8                                     | 0.63                                       | 87                                       |
